# Supplementary material for: Chiral discrimination of α-amino acids by the DNA triplet GCA
Source: Royal Society of Chemistry journal article supplement (doi:10.1039/b613232d), 2006-11-24
Supplement: b613232d.pdf [file b613232d.pdf]

**Electronic Supplementary Information for  
Chiral Discrimination of  $\alpha$ -Amino Acids by DNA triplet GCA**

**Additional figures:**

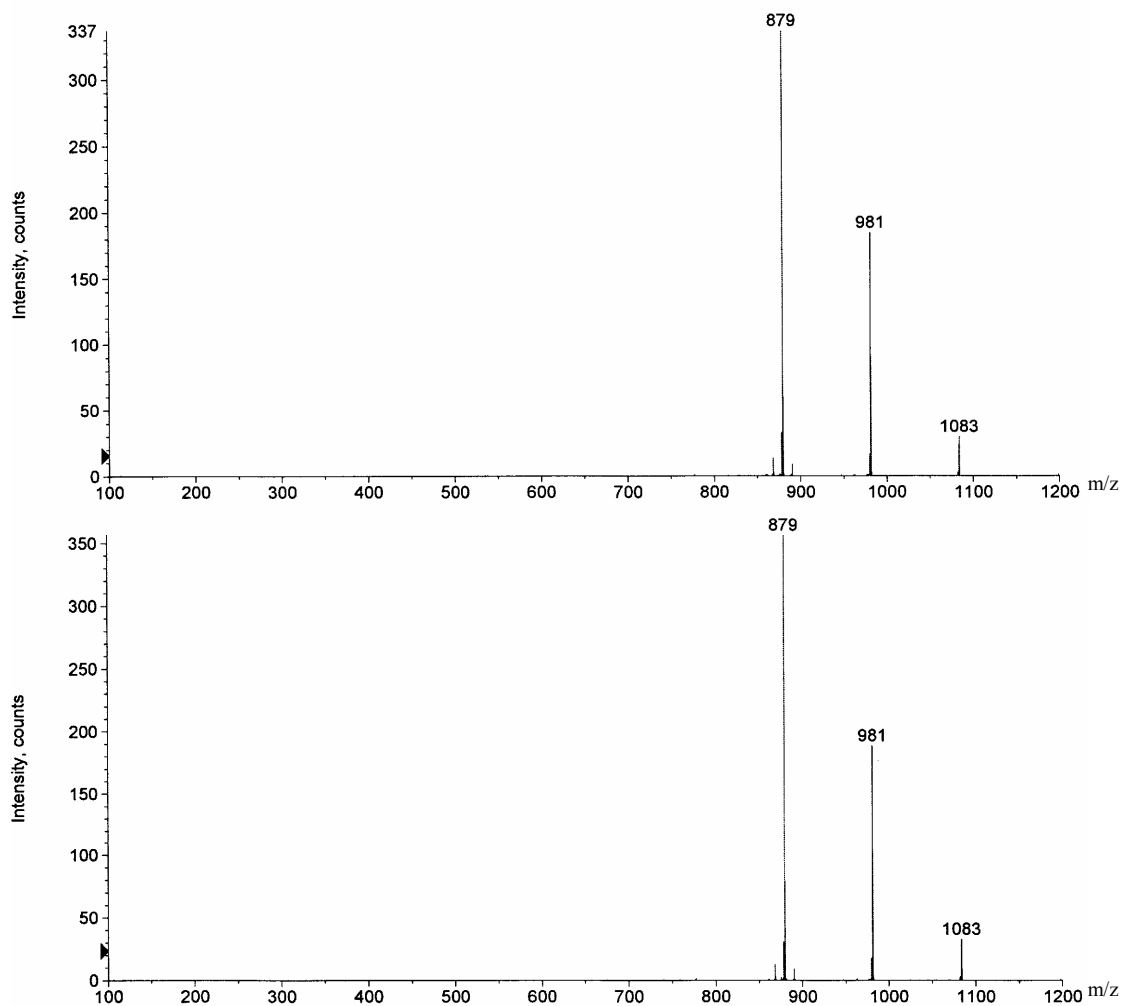

**Figure 1.** CID spectra of  $[2X+2Y-3H+Na]^{2-}$  ion, X= D- Tryptophan (top) or L- Tryptophan (bottom) and Y = ACG.

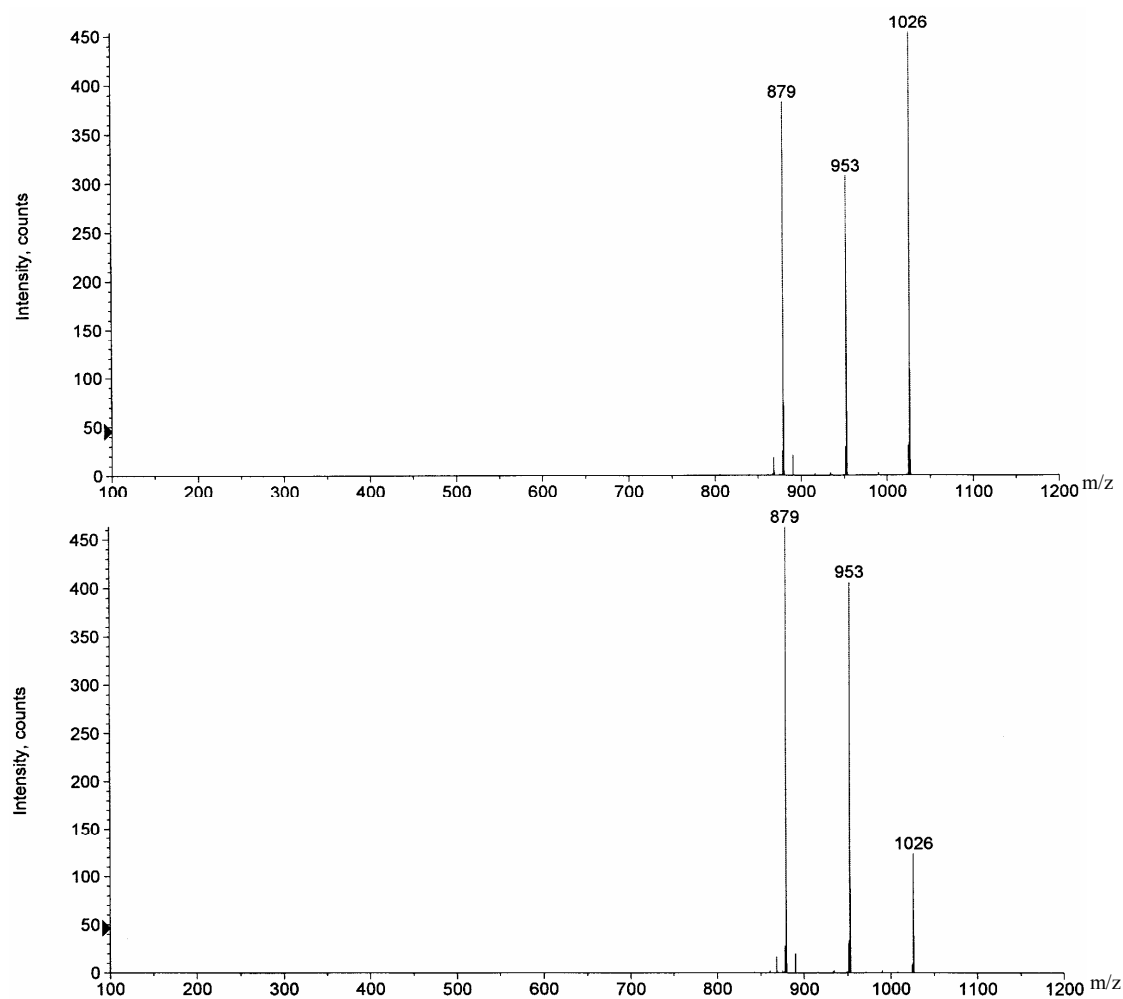

**Figure 2.** CID spectra of  $[2X+2Y-3H+Na]^{2-}$  ion, X = D- Glutamic acid (top) or L- Glutamic acid (bottom) and Y = GCA.

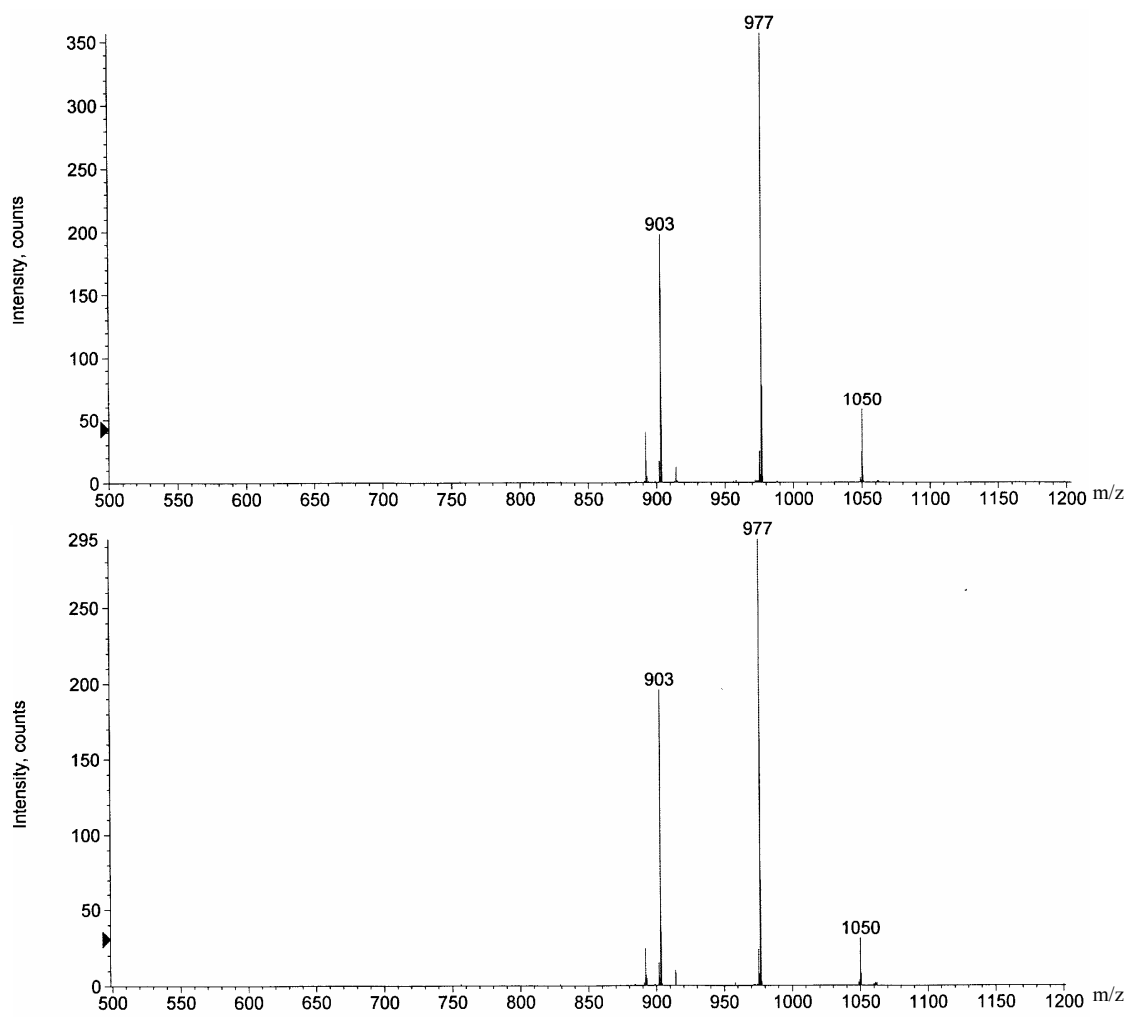

**Figure 3.** CID spectra of  $[2X+2Y-3H+Na]^{2-}$  ion, X = D- Glutamic acid (top) or L- Glutamic acid (bottom) and Y= GAA.

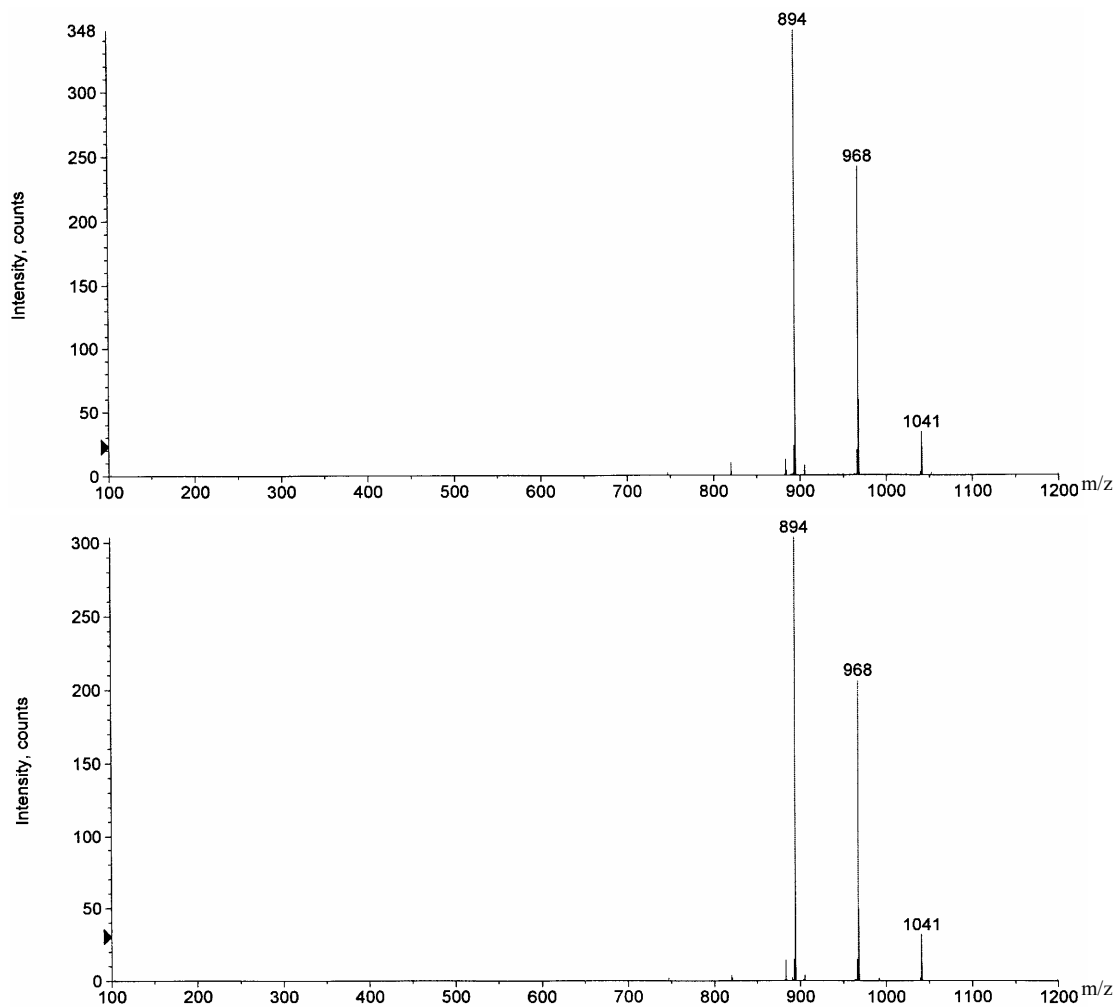

**Figure 4.** CID spectra of  $[2X+2Y-3H+Na]^{2-}$  ion, X = D- Glutamic acid (top) or L- Glutamic acid (bottom) and Y = GTA.

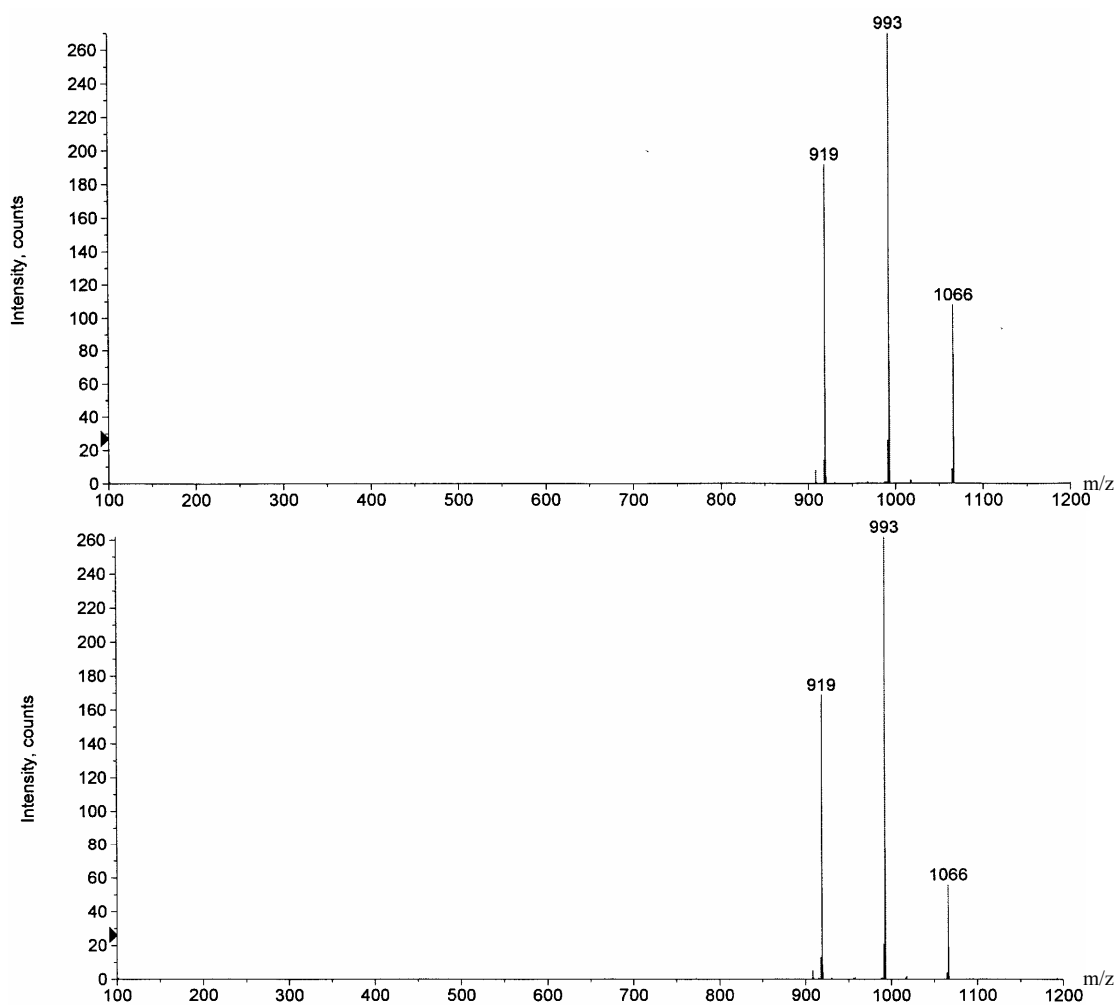

**Figure 5.** CID spectra of  $[2X+2Y-3H+Na]^{2-}$  ion, X = D- Glutamic acid (top) or L- Glutamic acid (bottom) and Y = GGA.

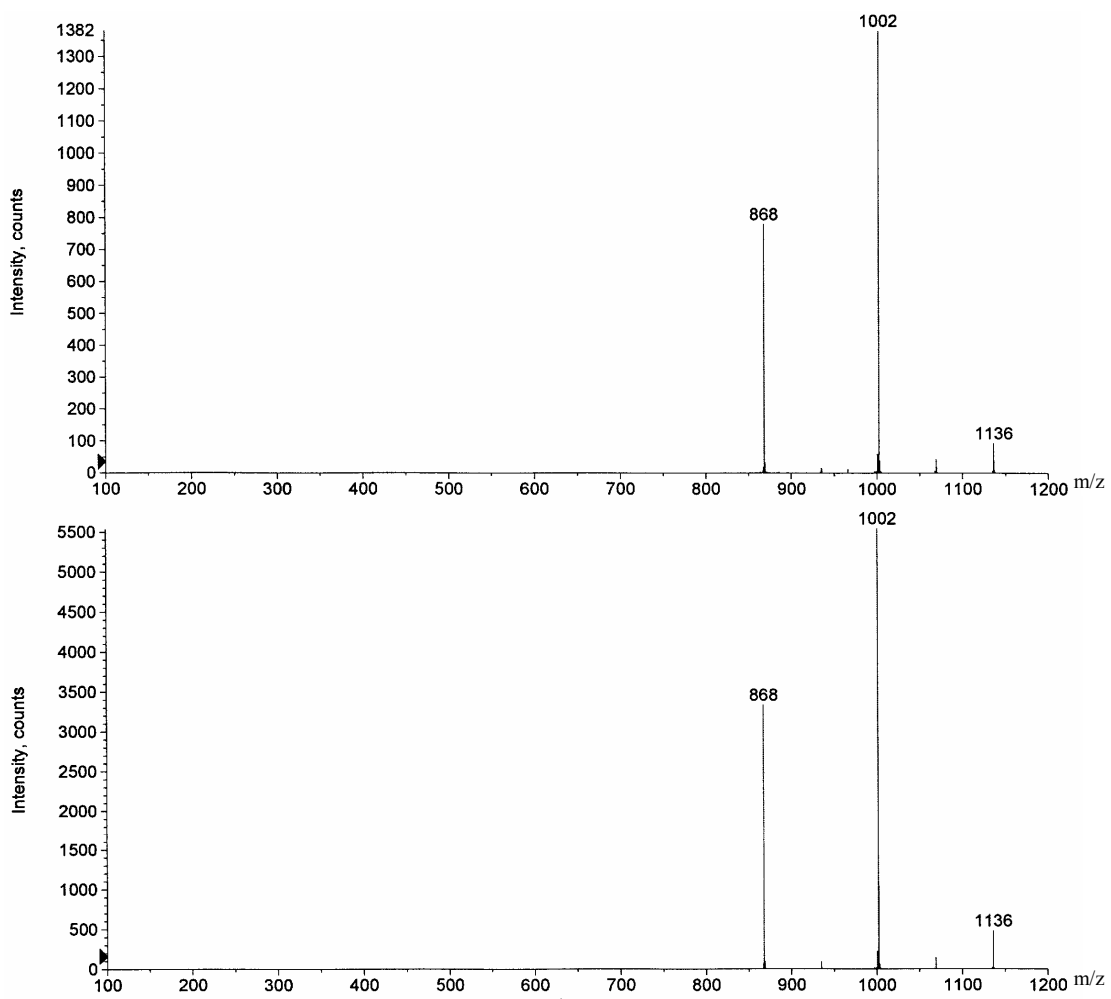

**Figure 6.** CID spectra of  $[2X+Y-H]^-$  ion, X = D- Malic acid (top) or L- Malic acid (bottom) and Y = GCA.

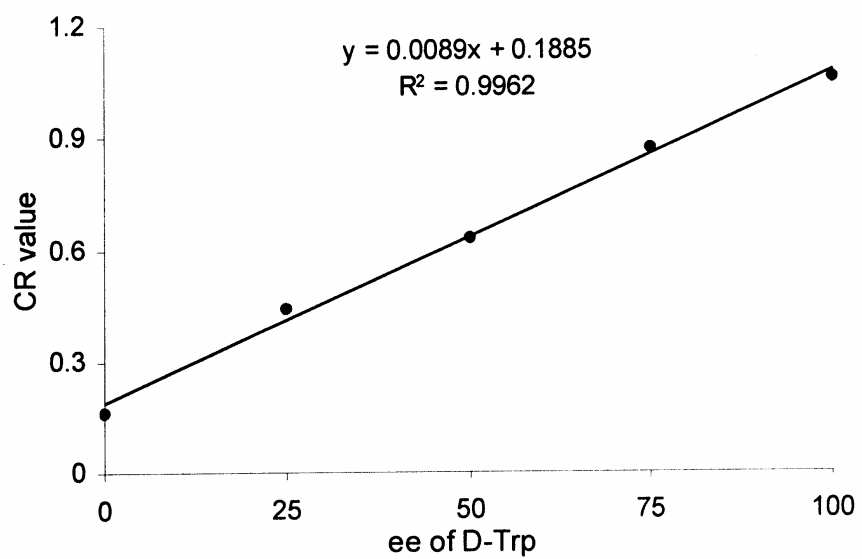

**Figure 7.** Plot of CR value (abundance ratio of **a/b**) versus ee of D-Trp with GCA as the chiral selector
